# Supplementary material for: A transcriptional time-course analysis of oral vs. aboral whole-body regeneration in the Sea anemone Nematostella vectensis
Source: PubMed Central journal article supplement (PMC5015328; doi:10.1186/s12864-016-3027-1), 2016-09-07
Supplement: 12864_2016_3027_MOESM2_ESM.pdf [file 12864_2016_3027_MOESM2_ESM.pdf]

# DE Oral clusters

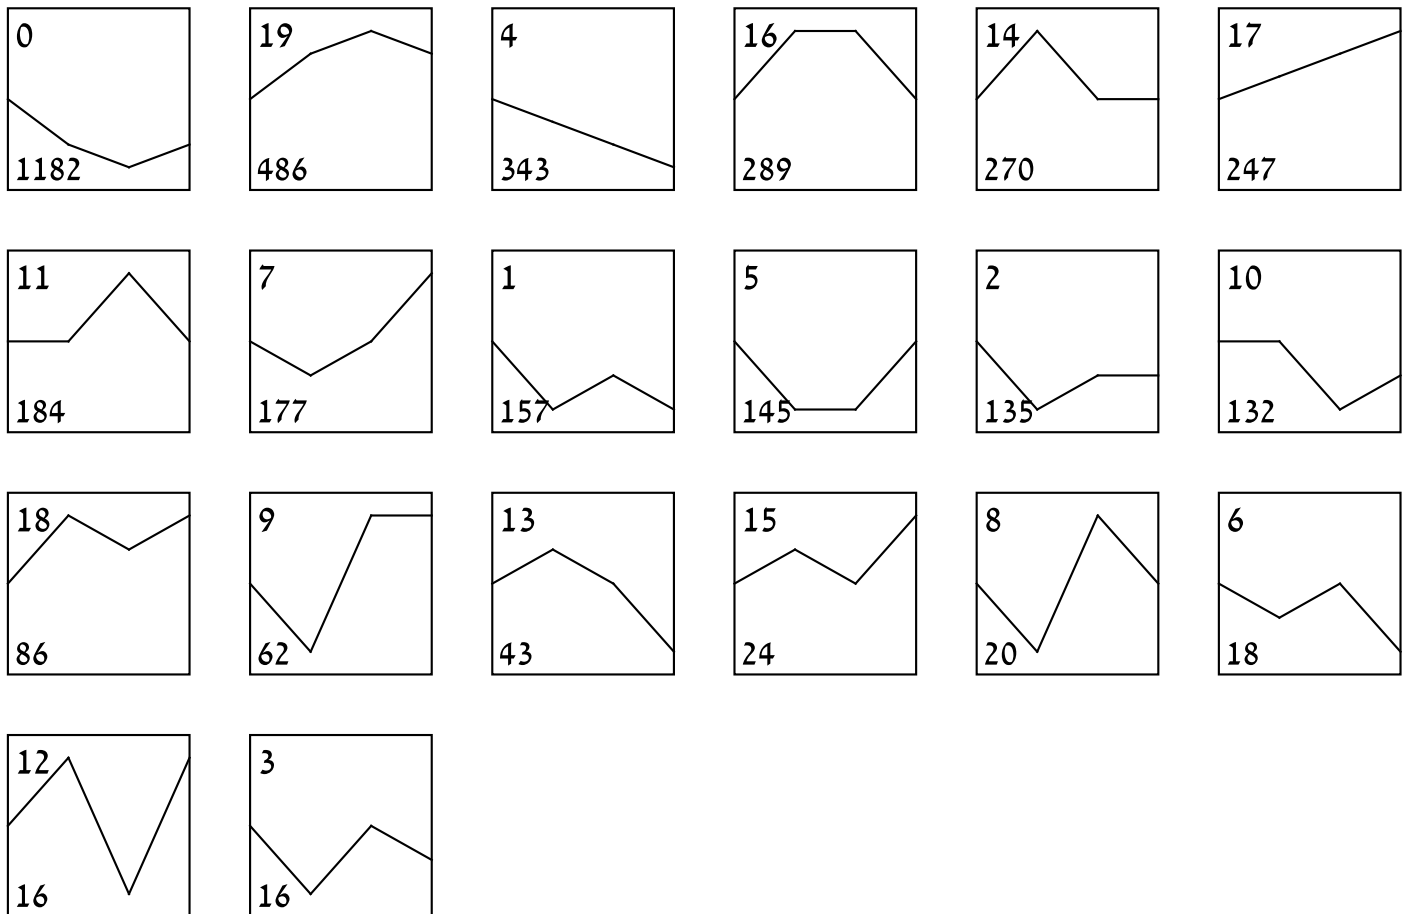

# DE Physa clusters

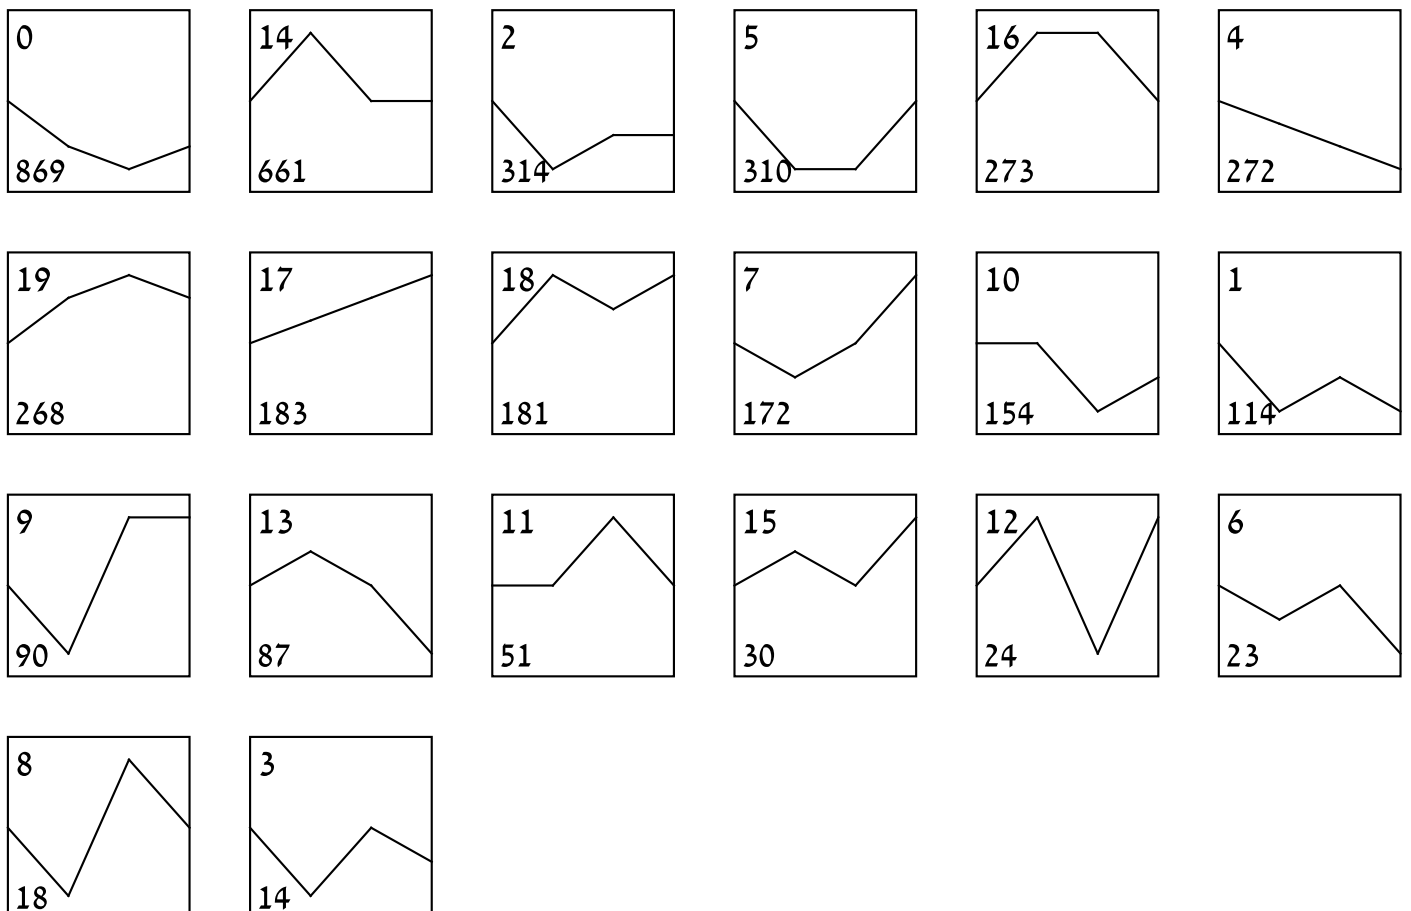

Profiles ordered based on the number of genes assigned
